# Supplementary material for: The role of substrates and electrodes in inkjet-printed PEDOT:PSS thermoelectric generators
Source: Royal Society of Chemistry journal article supplement (doi:10.1039/d4tc00505h), 2024-01-01
Supplement: d4tc00505h1.pdf [file d4tc00505h1.pdf]

## Supplementary Information

Jiang Jing,<sup>a, b</sup> Loup Chopplet,<sup>b</sup> Nicolas Battaglini,<sup>b</sup> Vincent Noël,<sup>b</sup> Benoit Piro,<sup>b</sup> Tim Leydecker,<sup>a</sup> Zhiming Wang,<sup>\*a</sup> Giorgio Mattana,<sup>\*b</sup> Emanuele Orgiu<sup>\*c</sup>

a. Institute of fundamental and frontier sciences (IFFS), University of electronic science and technology of China, Chengdu 610054, China

b. Université Paris Cité, ITODYS, CNRS, UMR 7086, 15 rue J.-A. de Baïf, Paris 75013, France

c. Institut national de la recherche scientifique (INRS), Centre Énergie Matériaux Télécommunications, 1650 Boul. Lionel Boulet, Varennes J3X 1S2, Canada

\*Authors to whom correspondence should be addressed: [zhmwang@uestc.edu.cn](mailto:zhmwang@uestc.edu.cn);  
[giorgio.mattana@u-paris.fr](mailto:giorgio.mattana@u-paris.fr) ; [emanuele.orgiu@inrs.ca](mailto:emanuele.orgiu@inrs.ca)

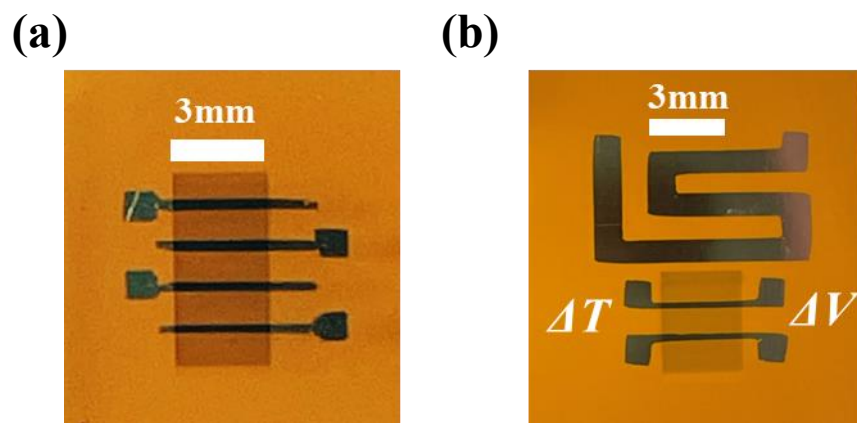

**Fig. S1.** Photograph of inkjet-printed PEDOT: PSS thin films (5-layers) on PI substrates for (a) conductivity measurement device, (b) Seebeck coefficient measurement device.

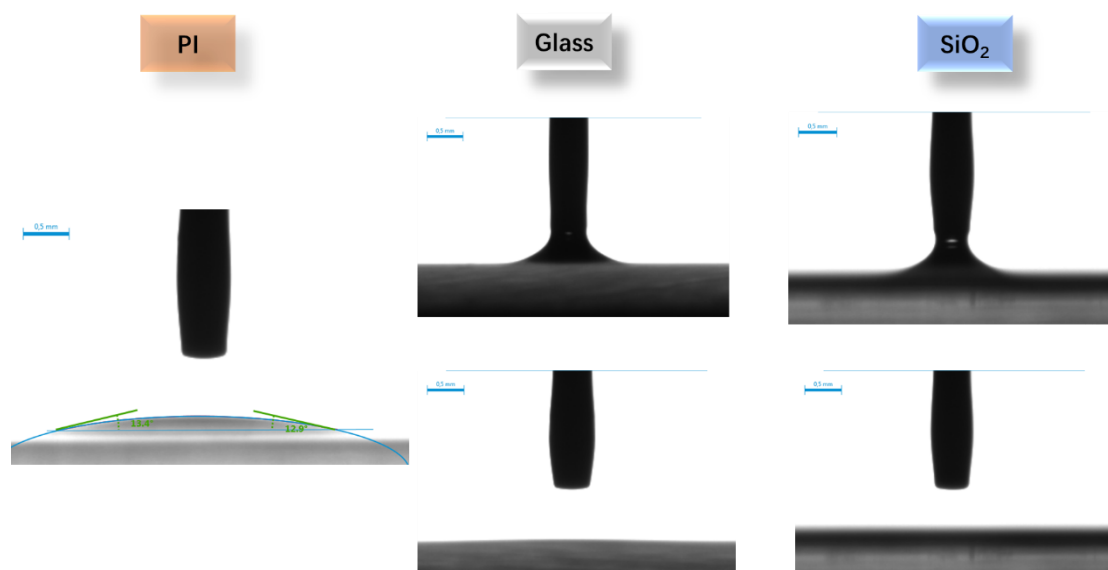

**Fig. S2.** Contact angle of PEDOT:PSS ink on the different substrates after UV-Ozone treatment. Contact angle is around 13° on the polyimide substrate. As shown, the contact angle for glass and silicon oxide substrate was undetermined following the UV-Ozone treatment due to the extreme hydrophilicity of the surface.

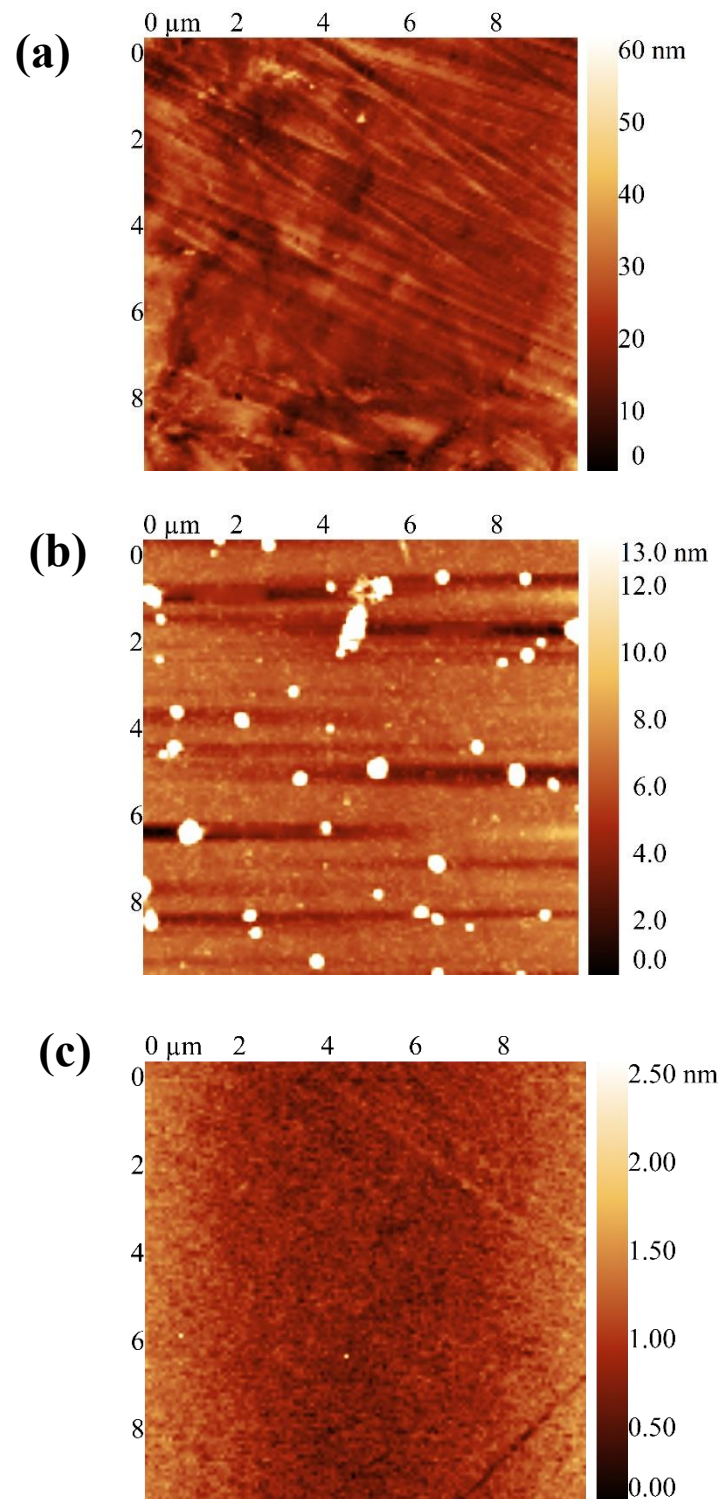

**Fig. S3.** AFM images for bare substrate (a) polyimide, Roughness $\approx$ 20nm, (b) glass, Roughness $\approx$ 5nm, (c) silicon oxide, Roughness $\approx$ <math>< 1.0\text{ nm}</math>. (image size  $10\times 10\ \mu\text{m}^2$ )

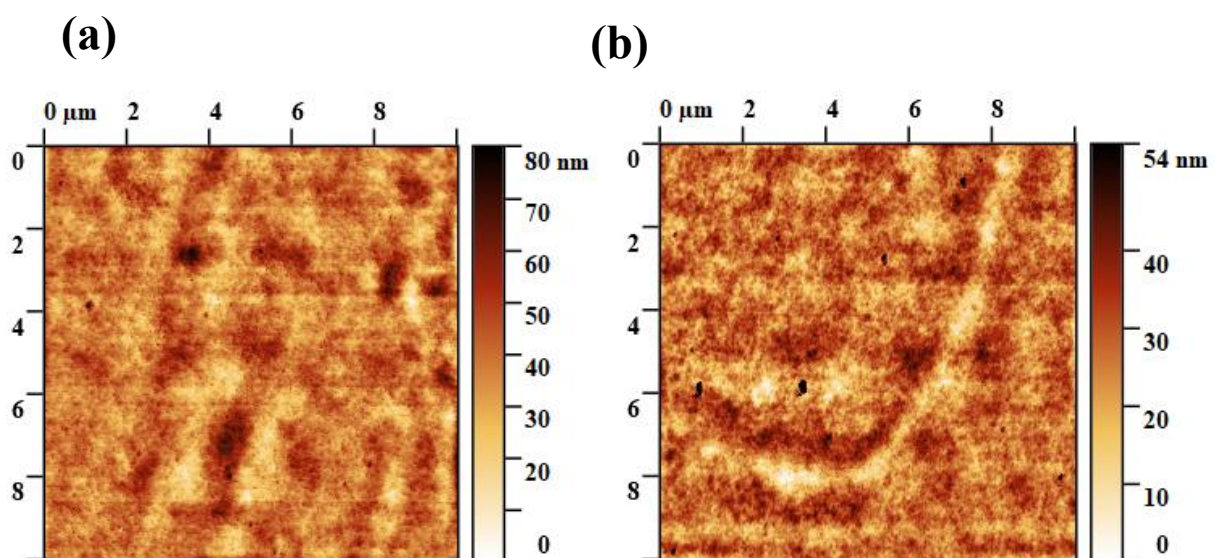

**Fig. S4.** AFM images of a five printed layers of PEDOT:PSS on (a) polyimide and (b) silicon oxide. (image size  $10 \times 10 \mu\text{m}^2$ )

**Table S1.** Properties of inkjet-printed PEDOT:PSS thin films on polyimide as a function of the number of layers.

| <b>Layers</b> | <b>Thickness<br/>[<math>\mu\text{m}</math>]</b> | <b><math>\sigma</math><br/>[<math>\text{S cm}^{-1}</math>]</b> | <b>Density<br/>[<math>\text{g cm}^{-3}</math>]</b> | <b><math>S</math><br/>[<math>\mu\text{V K}^{-1}</math>]</b> |
|---------------|-------------------------------------------------|----------------------------------------------------------------|----------------------------------------------------|-------------------------------------------------------------|
| 1             | $0.12 \pm 0.02$                                 | $265 \pm 10$                                                   | 0.9                                                | $6.6 \pm 0.5$                                               |
| 5             | $0.65 \pm 0.05$                                 | $330 \pm 10$                                                   | 3.0                                                | $7.4 \pm 0.5$                                               |
| 10            | $1.2 \pm 0.1$                                   | $410 \pm 10$                                                   | 3.4                                                | $3.8 \pm 1.0$                                               |
| 15            | $1.5 \pm 0.1$                                   | $410 \pm 10$                                                   | 3.5                                                | $3.5 \pm 1.0$                                               |

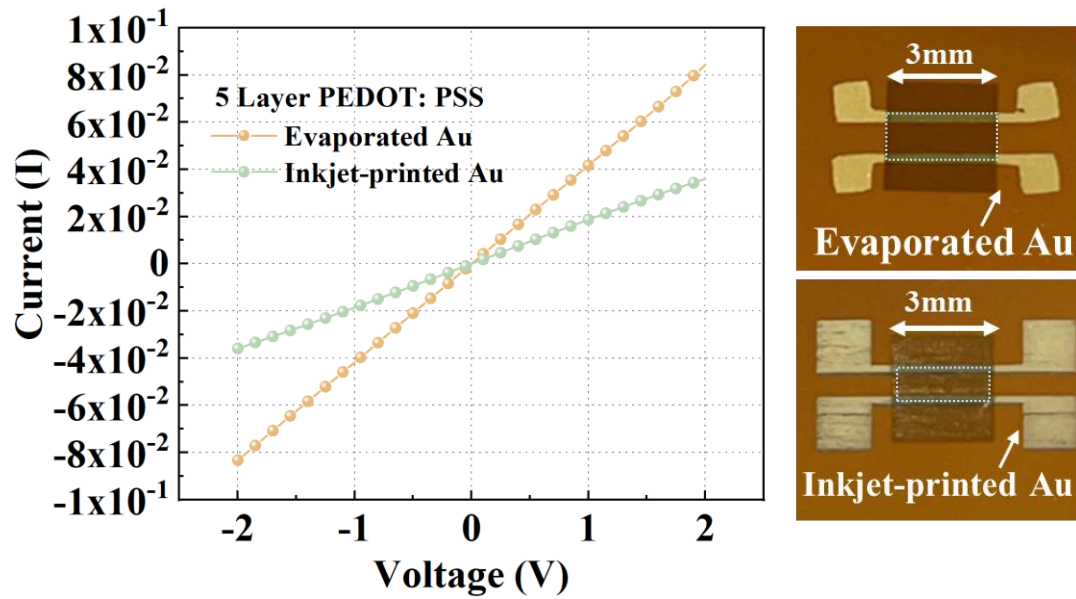

**Fig. S5.** *I* - *V* curves acquired on a 5-layer thin film of inkjet-printed PEDOT:PSS deposited on the top of thermally evaporated Au electrodes (orange circles) and inkjet-printed Au electrodes (green circles) on PI substrates. Top right: PEDOT:PSS deposited on thermally evaporated gold. Bottom right: PEDOT:PSS deposited on inkjet-printed gold. The ratio of active area between two electrodes (the dashed rectangle) is  $A_{\text{Eva-Au}}/A_{\text{Inkjet-Au}} \approx 1.65$ , the current ratio is  $I_{\text{Eva-Au}}/I_{\text{Inkjet-Au}} \approx 2.35$ .

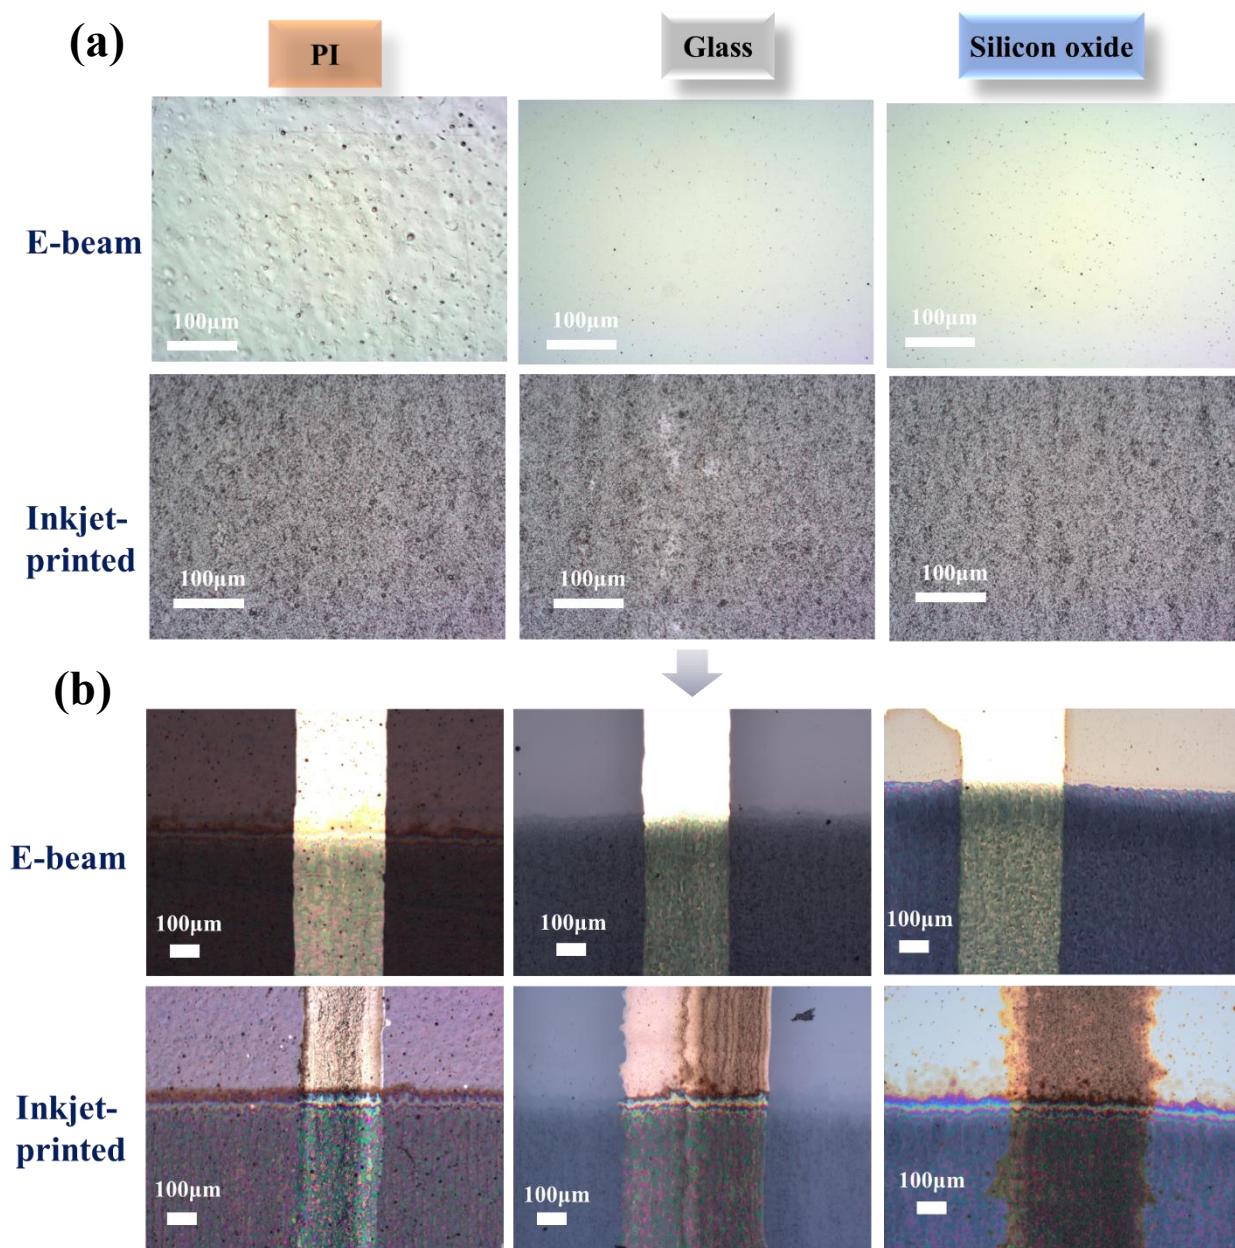

**Fig. S6.** Optical microscopic pictures (a) of e-beam and inkjet-printed gold electrodes on the different substrates; (b) of the 5-layer inkjet-printed PEDOT:PSS film deposited on the aforementioned electrodes.



**Table S2.** Work function of different electrodes and ionization potential of PEDOT:PSS.

| <b>Material</b>                             | <b>Work Function or Ionization Potential [eV]</b> |
|---------------------------------------------|---------------------------------------------------|
| e-beam evaporated Au                        | $4.39 \pm 0.02$                                   |
| Inkjet-printed Au                           | $3.50 \pm 0.10$                                   |
| PEDOT:PSS<br>(DMSO 5%, PEO 0.6%, by volume) | $4.47 \pm 0.05$                                   |
